# Supplementary material for: Osteoprotegerin and Myocardial Fibrosis in Patients with Aortic Stenosis
Source: PubMed Central journal article supplement (PMC6162228; doi:10.1038/s41598-018-32738-y), 2018-09-28
Supplement: 41598_2018_32738_MOESM1_ESM.pdf [file 41598_2018_32738_MOESM1_ESM.pdf]

## Osteoprotegerin and Myocardial Fibrosis in Patients with Aortic Stenosis

Brodie Loudon <sup>a,b</sup>, Eleana Ntatsaki <sup>c</sup>, Simon Newsome <sup>a</sup>, Brian Halliday <sup>a,d,#</sup>, Amrit Lota <sup>a,d</sup>,  
Aamir Ali <sup>a,d</sup>, Tamir Malley <sup>a</sup>, Subothini Selvendran <sup>a,d</sup>, Nikhil Aggarwal <sup>a,d</sup>, Willis Lam <sup>a</sup>, Jackie  
Donovan <sup>e</sup>, Dominique Auger <sup>a</sup>, Claire E Raphael <sup>a,d</sup>, Paul D Flynn <sup>f</sup>, Dudley J Pennell <sup>a,d</sup>,  
Vassilios S Vassiliou <sup>a,b,d,##</sup>, Sanjay K Prasad <sup>a,d,\*</sup>

\*Joint senior authors

# Joint corresponding authors

<sup>a</sup> CMR Unit, Royal Brompton Hospital and NIHR Biomedical Research Unit, Royal Brompton and Harefield Hospitals Imperial College London, London, United Kingdom

<sup>b</sup> Norwich Medical School, University of East Anglia, Bob Champion Research & Education Building and Norfolk and Norwich University Hospital, Norwich, United Kingdom

<sup>c</sup> Department of Rheumatology, Ipswich Hospital NHS Trust, and University College London, United Kingdom

<sup>d</sup> Imperial College London, London, United Kingdom

<sup>e</sup> Department of Biochemistry, Royal Brompton Hospital, London, United Kingdom

<sup>f</sup> Department of Metabolic Medicine, Addenbrooke's Hospital, Cambridge and University of Cambridge, United Kingdom

### #Address for Correspondence:

Dr Brian Halliday

CMR Unit, Royal Brompton Hospital, Sydney Street,  
London, SW3 6NP, UK

b.halliday@rbht.nhs.uk

Tel: +44 (0)20 7352 8121

Dr Vassilios Vassiliou

Norwich Medical School, University of East Anglia,  
Norwich Research Park, United Kingdom NR4 7UQ, UK

V.Vassiliou@uea.ac.uk

Tel: +44 (0) 1603 592534

## Supplementary Data

**Table 1: Baseline Patient Data by Fibrosis Pattern on CMR**

| <b>Demographics</b>                    | <b>No Fibrosis<br/>(n=36)</b> | <b>Midwall<br/>Fibrosis<br/>(n=38)</b> | <b>Infarction<br/>Fibrosis (n=36)</b> | <b>P-Value</b> |
|----------------------------------------|-------------------------------|----------------------------------------|---------------------------------------|----------------|
| Age, years                             | 72 ± 12                       | 77 ± 11                                | 78 ± 7                                | 0.025*         |
| Male, n (%)                            | 22 (61.1)                     | 31 (81.6)                              | 24 (66.7)                             | 0.13           |
| Hypertension, n (%)                    | 20 (58.8)                     | 17 (44.7)                              | 20 (57.1)                             | 0.44           |
| SBP, mmHg                              | 133 ± 19                      | 130 ± 25                               | 127 ± 18                              | 0.49           |
| DBP, mmHg                              | 72 ± 15                       | 72 ± 11                                | 68 ± 10                               | 0.25           |
| Diabetes mellitus, n (%)               | 2 (6.9)                       | 1 (3.0)                                | 2 (6.7)                               | 0.73           |
| Current smoker, n (%)                  | 3 (8.8)                       | 1 (2.6)                                | 1 (2.9)                               | 0.52           |
| Any coronary artery disease, n (%)     | 6 (16.7)                      | 11 (28.9)                              | 23 (63.9)                             | <0.0001*       |
| Previous stroke, n (%)                 | 0 (0.0)                       | 3 (7.9)                                | 0 (0.0)                               | 0.11           |
| Atrial Fibrillation, n (%)             | 4 (12.5)                      | 2 (5.6)                                | 5 (15.2)                              | 0.44           |
| Hypercholesterolaemia, n (%)           | 22 (66.7)                     | 22 (59.5)                              | 24 (68.6)                             | 0.71           |
| NYHA ≥ II                              | 27 (75.0)                     | 26 (68.4)                              | 26 (72.2)                             | 0.83           |
| Height, cm                             | 168 ± 12                      | 172 ± 10                               | 169 ± 10                              | 0.26           |
| Weight, kg                             | 79 ± 20                       | 82 ± 16                                | 71 ± 15                               | 0.026*         |
| BMI, kg/m <sup>2</sup>                 | 28 ± 5                        | 28 ± 4                                 | 25 ± 4                                | 0.004*         |
| <b>Medical therapy</b>                 |                               |                                        |                                       |                |
| Aspirin, n (%)                         | 15 (44.1)                     | 22 (59.5)                              | 26 (76.5)                             | 0.024*         |
| Clopidogrel, n (%)                     | 4 (12.1)                      | 4 (11.1)                               | 8 (25.0)                              | 0.25           |
| ACE I/ ARB, n (%)                      | 14 (41.2)                     | 13 (35.1)                              | 24 (72.7)                             | 0.004*         |
| Beta Blocker, n (%)                    | 11 (32.4)                     | 17 (48.6)                              | 18 (54.5)                             | 0.16           |
| Calcium channel blocker, n (%)         | 4 (12.5)                      | 4 (11.8)                               | 6 (18.2)                              | 0.77           |
| Diuretic, n (%)                        | 11 (32.4)                     | 23 (62.2)                              | 23 (65.7)                             | 0.010*         |
| Warfarin, n (%)                        | 5 (15.6)                      | 3 (8.3)                                | 2 (6.3)                               | 0.49           |
| Amiodarone, n (%)                      | 3 (8.8)                       | 1 (2.9)                                | 0 (0.0)                               | 0.27           |
| Statin, n (%)                          | 24 (70.6)                     | 25 (67.6)                              | 25 (73.5)                             | 0.83           |
| <b>Biochemical data</b>                |                               |                                        |                                       |                |
| Osteoprotegerin , pmol/L               | 6.15 ± 2.73                   | 7.15 ± 3.15                            | 8.37 ± 4.16                           | 0.023*         |
| Creatinine, µmol/L                     | 87 ± 21                       | 100 ± 33                               | 109 ± 41                              | 0.065          |
| <b>CMR data</b>                        |                               |                                        |                                       |                |
| CMR aortic valve area, cm <sup>2</sup> | 0.9 ± 0.4                     | 0.9 ± 0.2                              | 0.9 ± 0.2                             | 0.81           |
| Mild / Moderate AS, n (%)              | 13 (36.1)                     | 11 (28.9)                              | 11 (30.6)                             | 0.82           |

|                     |           |           |            |          |
|---------------------|-----------|-----------|------------|----------|
| Severe AS, n (%)    | 23 (63.9) | 27 (71.1) | 25 (69.4)  | 0.82     |
| LVEF, %             | 66 ± 12   | 59 ± 18   | 51 ± 13    | <0.0001* |
| LV Mass, g          | 153 ± 48  | 190 ± 66  | 158 ± 38   | 0.017*   |
| LGE Mass            | 0 ± 0     | 7.0 ± 8.3 | 11.3 ± 7.2 | -        |
| LGE Percent         | 0 ± 0     | 3.7 ± 3.7 | 7.6 ± 5.9  | -        |
| <b>Intervention</b> |           |           |            |          |
| None                | 20 (55.6) | 14 (36.8) | 11 (30.6)  | 0.13     |
| AVR                 | 11 (30.6) | 11 (28.9) | 12 (33.3)  | 0.13     |
| TAVI                | 5 (13.9)  | 13 (34.2) | 13 (36.1)  | 0.13     |

Values are mean ± SD unless otherwise stated. \*p < 0.05. Baseline data for AS patients based on fibrosis pattern on CMR. ACE-I, angiotensin converting enzyme inhibitor; ARB, angiotensin II receptor blocker; AVR, aortic valve replacement; BMI, body mass index; CMR, cardiovascular magnetic resonance; DBP, diastolic blood pressure; LGE, late gadolinium enhancement; LVEF, left ventricular ejection fraction; NYHA, New York Heart Association; SBP, systolic blood pressure; TAVR, transcatheter aortic valve replacement.

### Supplementary Figure 1

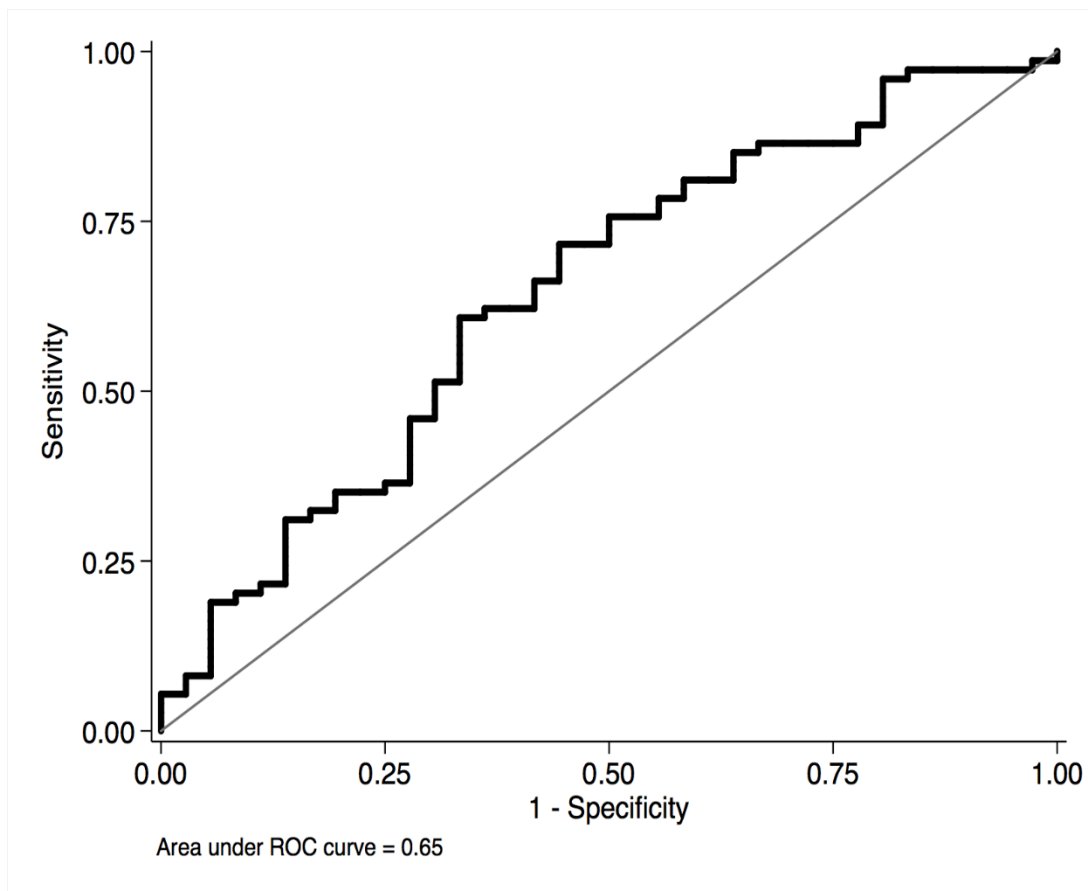

**Receiver-operating characteristic (ROC) curve analysis for predicting AS severity.** ROC curve describes the diagnostic performance of serum OPG in the distinction of severe and mild/moderate AS. Area under the ROC curve (AUC) was 0.69.

## Supplementary Figure 2

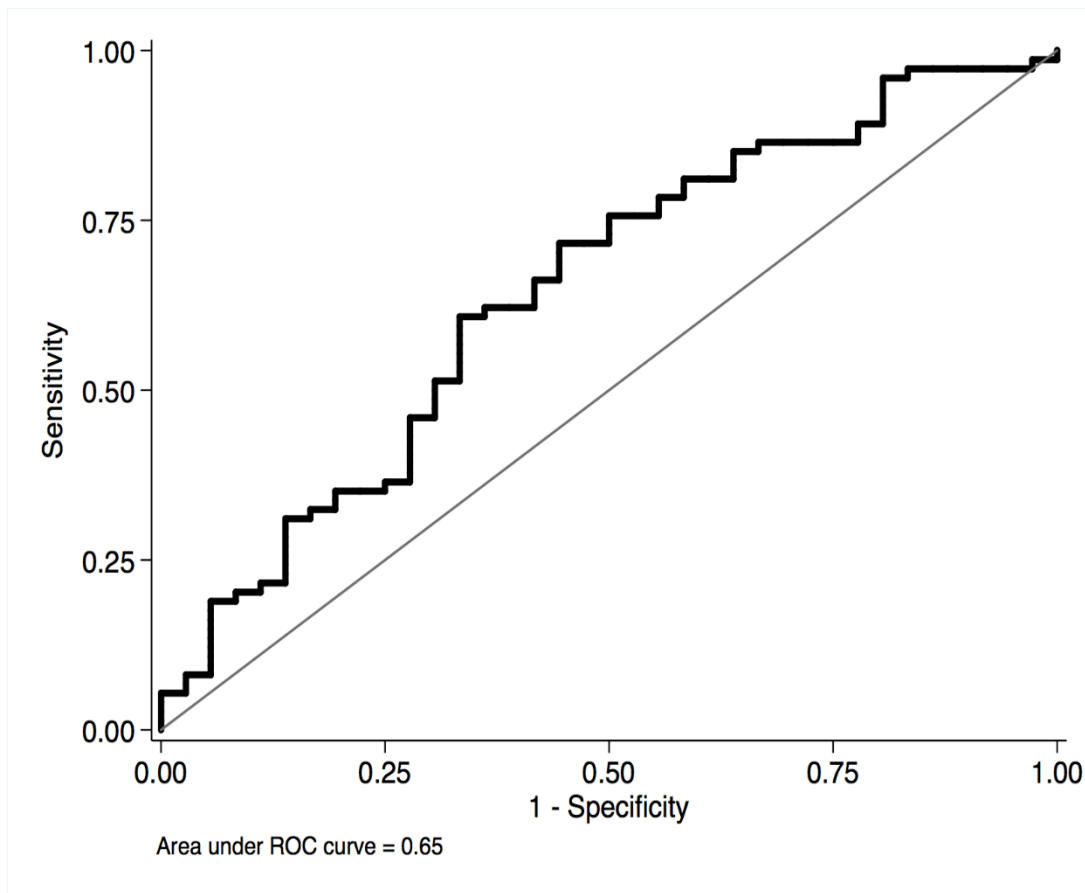

**Receiver-operating characteristic (ROC) curve analysis for predicting LV fibrosis.** ROC curve describes the diagnostic performance of serum OPG in the distinction of 'any fibrosis' and 'no fibrosis' on CMR. Area under the ROC curve (AUC) was 0.65.
